# Supplementary material for: Micro-ribonucleic acid-155 is a direct target of Meis1, but not a driver in acute myeloid leukemia
Source: PubMed Central journal article supplement — Haematologica. 2017 Dec 7;103(2):246–55. doi: 10.3324/haematol.2017.177485 (PMC5792269; doi:10.3324/haematol.2017.177485), 2018-02
Supplement: 2017_177485-Disclosures_and_Contributions.pdf [file 2017_177485-Disclosures_and_Contributions.pdf]

Haematologica  
HAEMATOL/2017/177485  
Version 3

MicroRNA-155 is a direct target of Meis1, but not a driver in acute myeloid leukemia

Edith Schneider, Anna Staffas, Linda Röhner, Erik D. Malmberg, Arghavan Ashouri, Kathrin Krowiorz, Nicole Pochert, Christina Miller, Stella Yuan Wei, Laleh Arabanian, Christian Buske, Hartmut Döhner, Lars Bullinger, Linda Fogelstrand, Michael Heuser, Konstanze Döhner, Ping Xiang, Jens Ruschmann, Oleh I. Petriv, Alireza Heravi-Moussavi, Carl L. Hansen, Martin Hirst, R. Keith Humphries, Arefeh Rouhi, Lars Palmqvist, and Florian Kuchenbauer

Disclosures: F.K. was supported by grants from Deutsche Krebshilfe grant 109420 (Max-Eder program); fellowship 2010/04 by the European Hematology Association; and by the Deutsche Forschungsgemeinschaft (DFG) (SFB 1074, project A5) and the Wilhelm Sander Stiftung (2015.153.1). A.R. was supported by the DFG (SFB 1074, project A5) as well as the gender equality program by the DFG (SFB 1074, project Z2), a fellowship from the Canadian Institutes of Health Research and the Baustein Startförderung Program of the Medical Faculty, Ulm University. L.P. was supported by grants from the Swedish Cancer Society (CAN2014/525), the Swedish Childhood Cancer Foundation (PR2014-0125), and Västra Götalandsregionen (ALFGBG-431881). LB was supported in part by the German Research Foundation (Heisenberg-Stipendium BU 1339/3-1). The authors declare no conflict of interest.

Contributions: E.S. and A.S. designed and performed the experiments and wrote the manuscript. L.F. provided patient samples, antibodies and edited the manuscript. L.R., E.D.M., A.A., K.K., N.P., C.M., S.Y.W., L.A., P.X., J.R. and O.I.P. performed experiments. C.B. supported FACS-sorting. H.D., M.H., L.B and K.D. provided patient samples and edited the manuscript. A.H.M, C.L.H. and M.H. provided sequencing resources and bioinformatical support. R.K.H. provided vectors and edited the manuscript. A.R., L.P. and F.K. designed the study and wrote the manuscript.
